# Supplementary material
Source: PubMed Central journal article supplement (PMC3256332)
Supplement: epi0612_1436SD1.pdf [file epi0612_1436SD1.pdf]

**Supplementary Table 1: Primer sequences**

| <b>Assay</b>        | <b>Primer name</b> | <b>Sequence</b>                                          |
|---------------------|--------------------|----------------------------------------------------------|
| <b>DAPK MSP</b>     | <i>DAPK-MF</i>     | GTG TTA TAG GTG GGG CGT TC                               |
|                     | <i>DAPK-MR</i>     | CCG ACG CTA CAA ATT CTA CG                               |
|                     | <i>DAPK-UF</i>     | TAA TGT GTT ATA GGT GGG GTG TTT                          |
|                     | <i>DAPK-UR</i>     | CCA AAC CAAA CAC TAC AAA TTC TAC A                       |
| <b>LCK Sequenom</b> | <i>LCK-E28_F5</i>  | AGGAAGAGAGGGTTAGGTTAGGAGGATTATGTGAA                      |
|                     | <i>LCK-E28_F3</i>  | CAGTAATACGACTCACTATAGGGAGAAGGCTCAACCACAAAAAACTACTACATCCC |
| <b>LTA Sequenom</b> | <i>LTA_P214_5</i>  | AGGAAGAGAGGGGGTAGGAGAGTTTTATTTGTTGT                      |
|                     | <i>LTA_P214_3</i>  | CAGTAATACGACTCACTATAGGGAGAAGGCTAAACTCTAAACCTAACCCCACTCC  |

**Supplementary Table 2: Locus-by-locus results for Parvovirus B19 IgG levels related to individual gene loci on the Illumina GoldenGate Cancer Panel 1.**

| <u>RANK</u> | <u>Locus</u>   | <u>coefficient</u> | <u>P-value</u> | <u>Q -value</u> |
|-------------|----------------|--------------------|----------------|-----------------|
| 1           | PI3_P274_R     | -0.204             | 0.000          | 0.000           |
| 2           | LCN2_P86_R     | -0.165             | 0.000          | 0.020           |
| 3           | PURA_P928_R    | 0.051              | 0.001          | 0.356           |
| 4           | TRIP6_P1090_F  | -0.210             | 0.002          | 0.677           |
| 5           | LCN2_P141_R    | -0.139             | 0.003          | 0.677           |
| 6           | AIM2_P624_F    | -0.157             | 0.003          | 0.691           |
| 7           | LCK_E28_F      | 0.098              | 0.005          | 0.918           |
| 8           | BLK_P14_F      | 0.155              | 0.006          | 0.918           |
| 9           | PDGFRA_E125_F  | -0.119             | 0.011          | 0.918           |
| 10          | MPL_P657_F     | 0.114              | 0.013          | 0.918           |
| 11          | PECAM1_E32_R   | -0.181             | 0.014          | 0.918           |
| 12          | ERCC3_P1210_R  | -0.116             | 0.016          | 0.918           |
| 13          | VIM_P811_R     | 0.018              | 0.018          | 0.918           |
| 14          | RARA_E128_R    | 0.068              | 0.024          | 0.918           |
| 15          | PRKCDBP_P352_R | -0.132             | 0.026          | 0.918           |
| 16          | DBC1_E204_F    | -0.121             | 0.029          | 0.918           |
| 17          | HTR1B_E232_R   | -0.120             | 0.031          | 0.918           |
| 18          | LTA_P214_R     | 0.117              | 0.034          | 0.918           |
| 19          | PSCA_E359_F    | 0.090              | 0.035          | 0.918           |
| 20          | HS3ST2_E145_R  | -0.152             | 0.036          | 0.918           |
| 21          | PI3_P1394_R    | 0.118              | 0.037          | 0.918           |
| 22          | CCKBR_P480_F   | -0.159             | 0.038          | 0.918           |
| 23          | NEFL_P209_R    | -0.127             | 0.039          | 0.918           |
| 24          | FGFR2_P266_R   | -0.175             | 0.039          | 0.918           |
| 25          | DCC_P471_R     | -0.123             | 0.040          | 0.918           |
| 26          | ATP10A_P147_F  | 0.082              | 0.041          | 0.918           |
| 27          | MT1A_P49_R     | -0.188             | 0.042          | 0.918           |
| 28          | PECAM1_P135_F  | -0.146             | 0.044          | 0.918           |
| 29          | ALK_E183_R     | -0.155             | 0.044          | 0.918           |
| 30          | MT1A_P600_F    | -0.135             | 0.046          | 0.918           |
